# Supplementary material
Source: Research Square preprint supplement (doi:10.21203/rs.3.rs-9055444/v1)
Supplement: Supplementary file 1 [file 257ad7a563026e5eaeefdaef.docx]

**Supplementary appendix 1 :**

- Protocol
- Fig. 1a Word cloud Before and After intervention Group K.
- Fig. 2a Word cloud Before and After intervention Group N.
- Fig. 3 Word cloud Before and After intervention Group E.
- Fig. 4 Word cloud Before and After intervention Group H.
- Fig. 5 Density of general practitioners.
